# Supplementary material for: Evaluation of the Impact of the Cancer Therapy Everolimus on the Central Nervous System in Mice
Source: PubMed Central journal article supplement (PMC4250083; doi:10.1371/journal.pone.0113533), 2014-12-01

Control

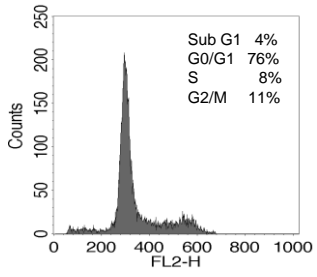

Vehicle

$10^{-8}$  M

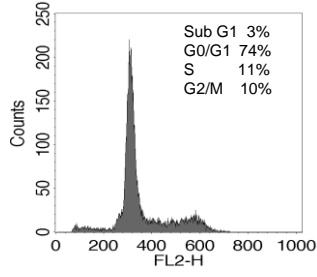

Everolimus

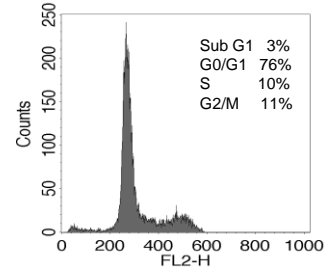

$10^{-7}$  M

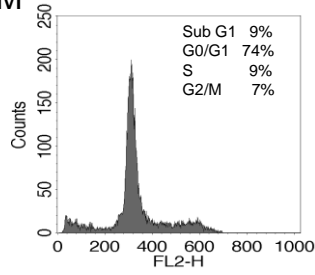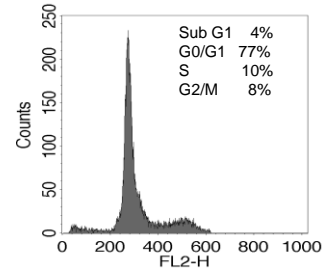

$10^{-6}$  M

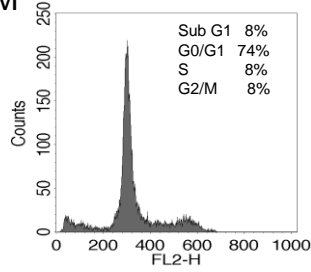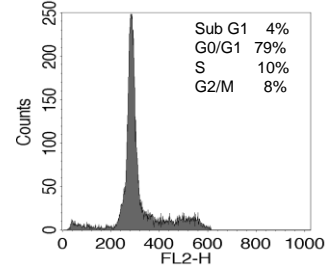

$10^{-5}$  M

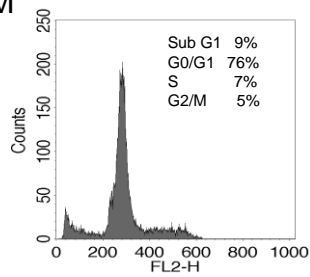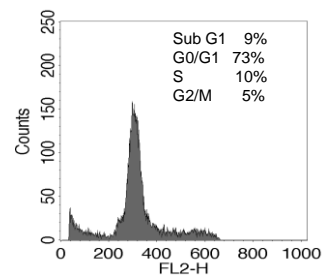

Supplement: pone.0113533.s002.pdf [file pone.0113533.s002.pdf]
