# Supplementary material for: Evaluation of the Impact of the Cancer Therapy Everolimus on the Central Nervous System in Mice
Source: PubMed Central journal article supplement (PMC4250083; doi:10.1371/journal.pone.0113533), 2014-12-01
Supplement: pone.0113533.s003.pdf [file pone.0113533.s003.pdf]

A

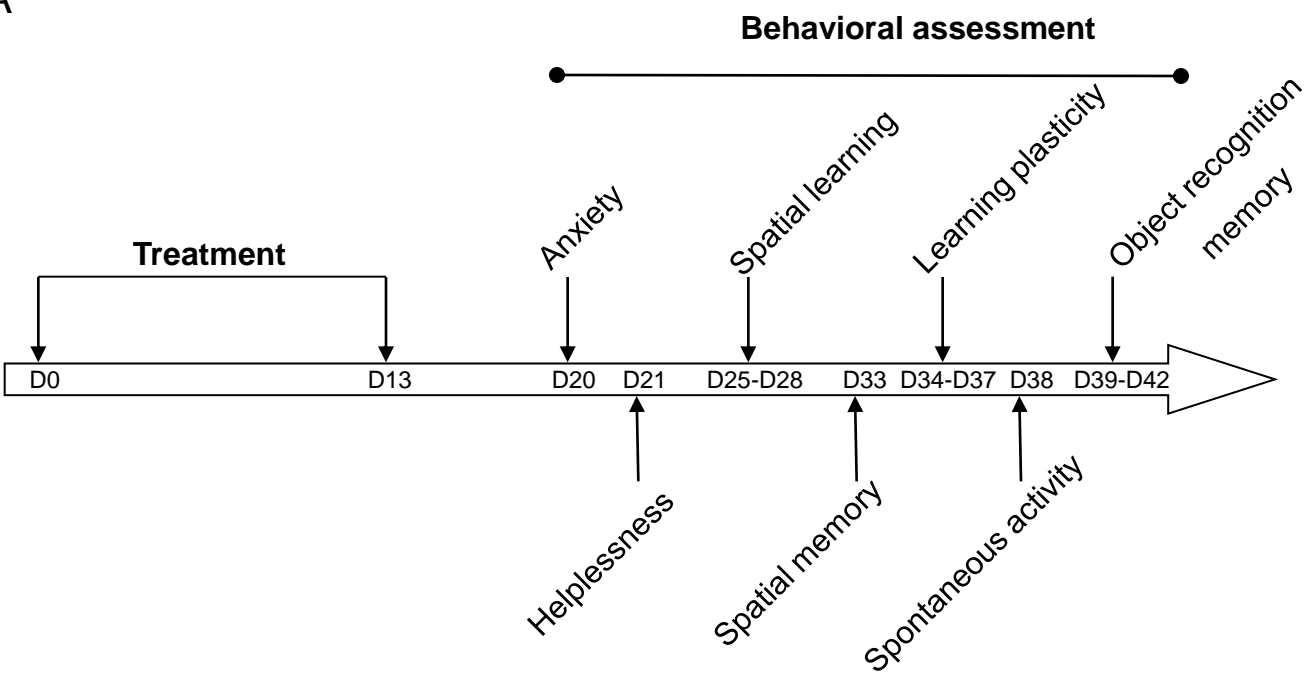

B

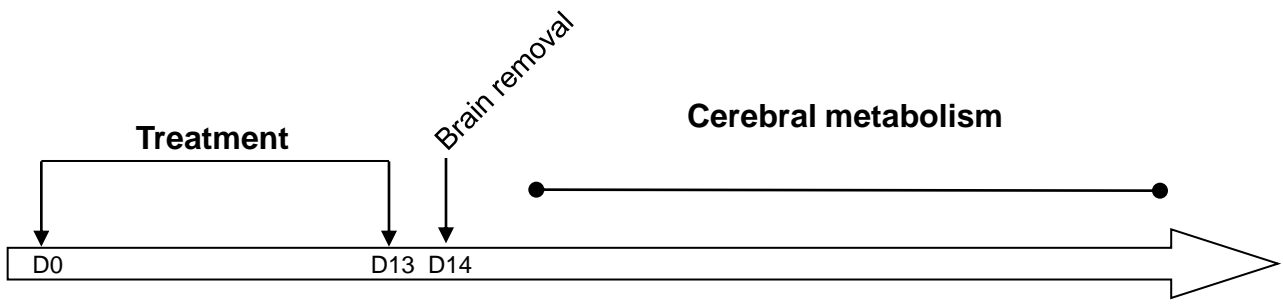

C

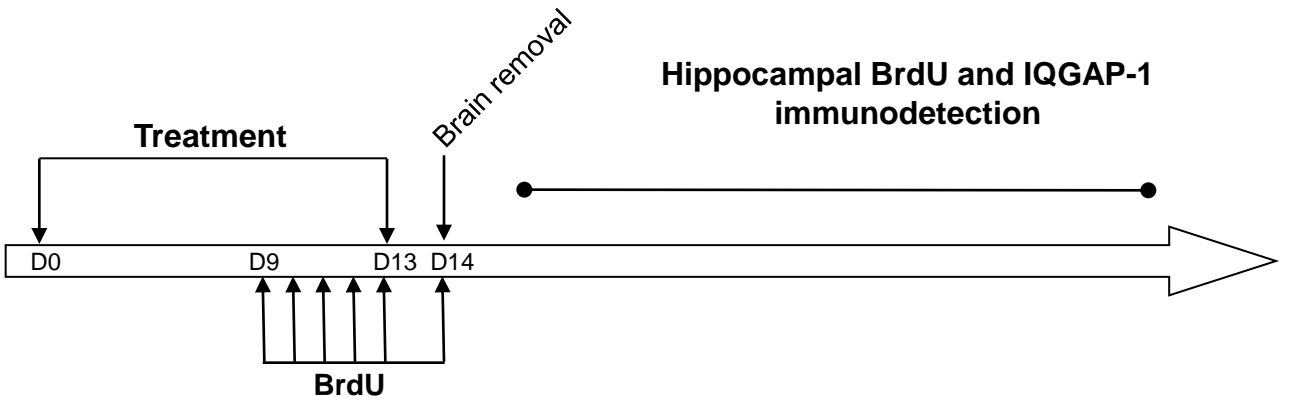

Figure S3
